# Supplementary material for: Estrogenic Effects of Extracts and Isolated Compounds from Belowground and Aerial Parts of Spartina anglica
Source: MDPI journal article supplement (doi:10.3390/md19040210), 2021-04-11
Supplement: s1 [file s1]

# Estrogenic Effects of Extracts and Isolated Compounds from Belowground and Aerial Parts of *Spartina anglica*

Sullim Lee<sup>1,†</sup>, Geum Jin Kim<sup>2,3,†</sup>, Hyukbean Kwon<sup>2</sup>, Joo-Won Nam<sup>2</sup>, Ji Yun Baek<sup>4,5</sup>, Sang Hee Shim<sup>6</sup>, Hyukjae Choi<sup>2,3\*</sup> and Ki Sung Kang<sup>4,\*</sup>

<sup>1</sup> Department of Life Science, College of Bio-Nano Technology, Gachon University, Seongnam 13120, Republic of Korea; sullimlee@gachon.ac.kr (S.L.)

<sup>2</sup> College of Pharmacy, Yeungnam University, Gyeongsan 38541, Republic of Korea; canta87@ynu.ac.kr (G.J.K.), zero9602@gmail.com (H.K.), jwnam@yu.ac.kr (J.-W.N.)

<sup>3</sup> Research Institute of Cell Culture, Yeungnam University, Gyeongsan, Gyeongbuk 38541, Republic of Korea

<sup>4</sup> College of Korean Medicine, Gachon University, Seongnam 13120, Republic of Korea; wldbsttn@naver.com (J.Y.B.), kkang@gachon.ac.kr (K.S.K.)

<sup>5</sup> Department of Food Science, Gyeongnam National University of Science and Technology, Jinju 52725 Republic of Korea; wldbsttn@naver.com (J.Y.B.)

<sup>6</sup> Natural Products Research Institute, College of Pharmacy, Seoul National University, 1 Gwanak-ro, Gwanak-gu, Seoul, 08826, Republic of Korea; sanghee\_shim@snu.ac.kr (S. H. S.)

\* Correspondence: E-mail: kkang@gachon.ac.kr; Tel.: 82-31-750-5402 (K.S.K.), h5choi@yu.ac.kr; Tel.: 82-53-810-2824 (H.C.)

† These authors contributed equally to this work.

## Contents

**Figure S1.** 1D NMR spectra of compound **1** in CD<sub>3</sub>OD

**Figure S2.** 2D NMR spectra of compound **1** in CD<sub>3</sub>OD

**Figure S3.** 1D NMR spectra of compound **2** in DMSO-*d*<sub>6</sub>

**Figure S4.** 1D NMR spectra of compound **3** in CD<sub>3</sub>OD

**Figure S5.** 1D NMR spectra of compound **4** in CD<sub>3</sub>OD

**Figure S6.** 1D NMR spectra of compound **5** in CD<sub>3</sub>OD

Figure S1. 1D NMR spectra of compound **1** in CD<sub>3</sub>OD

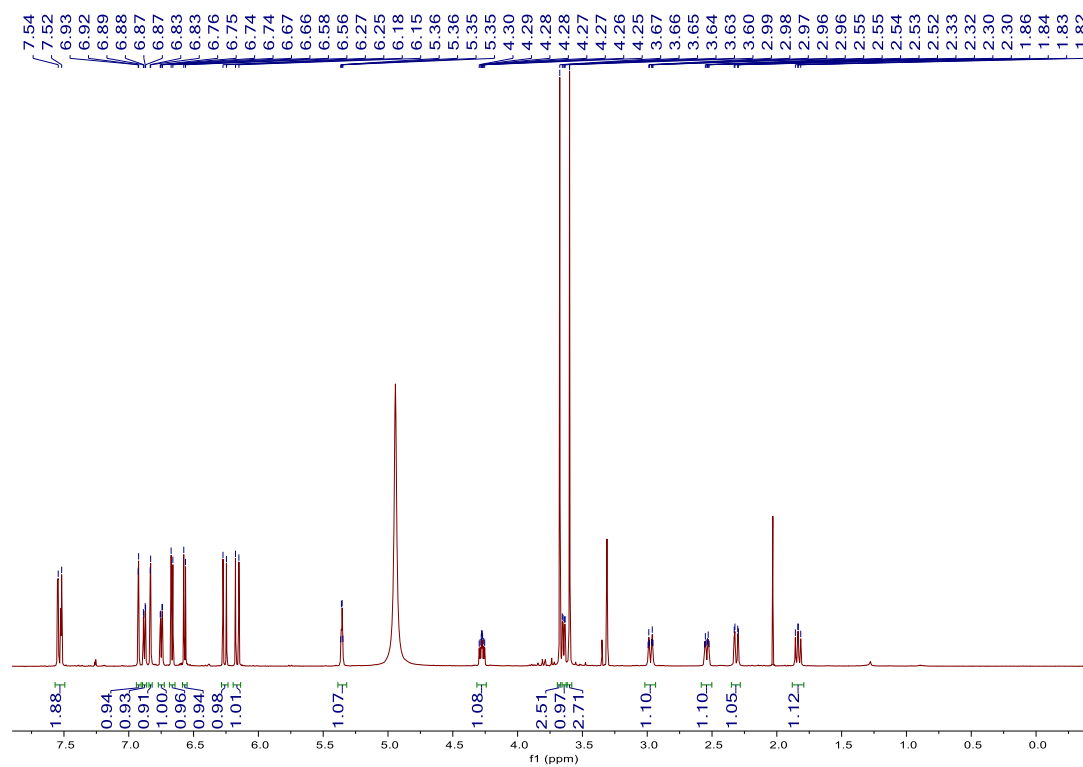

The <sup>1</sup>H NMR spectrum of **1** (600 MHz)

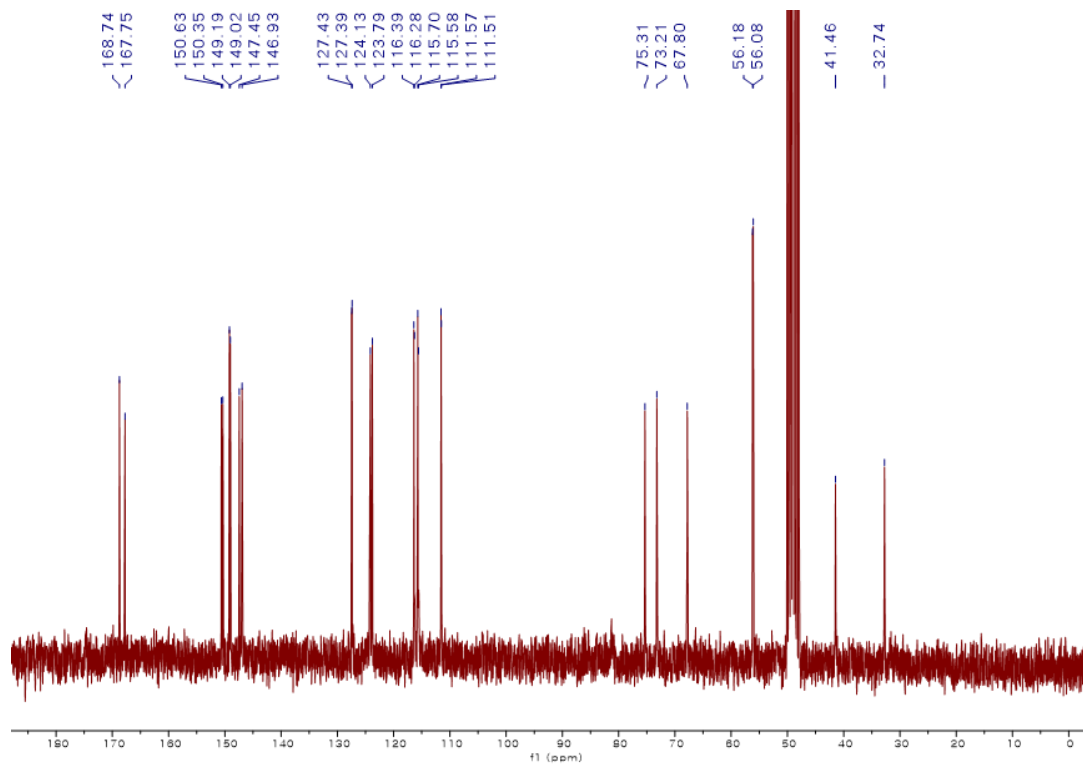

The <sup>13</sup>C NMR spectrum of **1** (62.5 MHz)

Figure S2. 2D NMR spectra of compound **1** in CD<sub>3</sub>OD

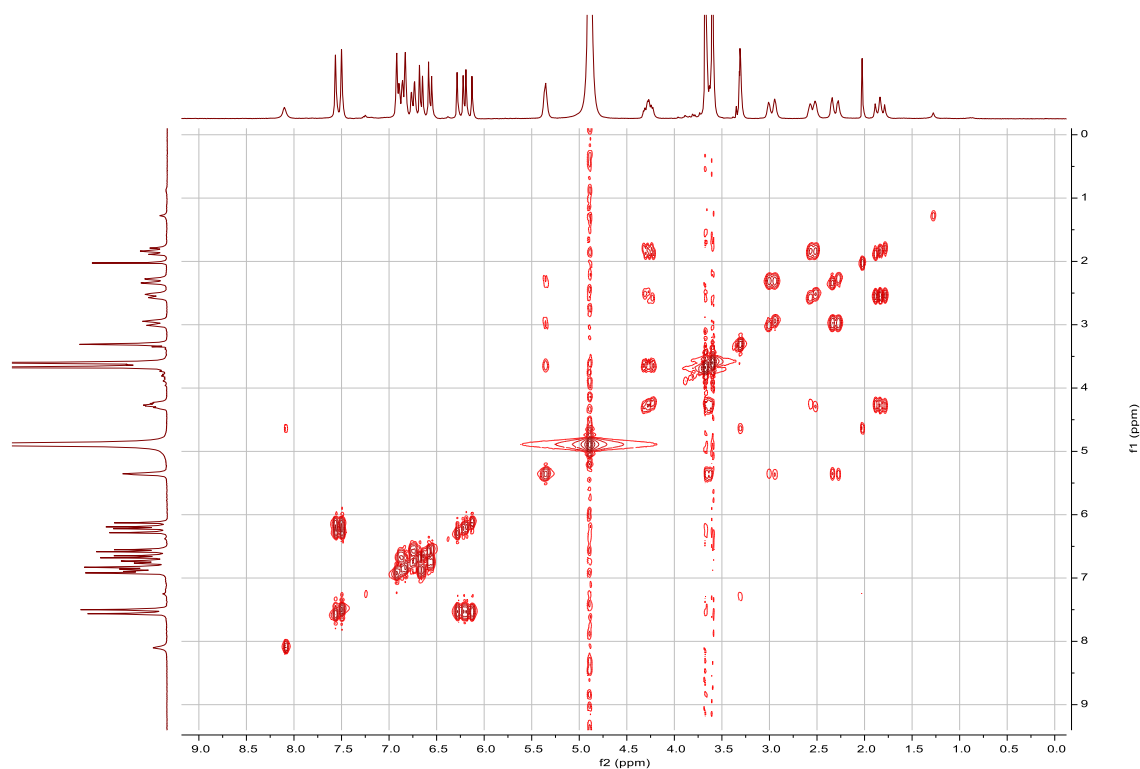

The <sup>1</sup>H-<sup>1</sup>H COSY spectrum of **1** (250 MHz)

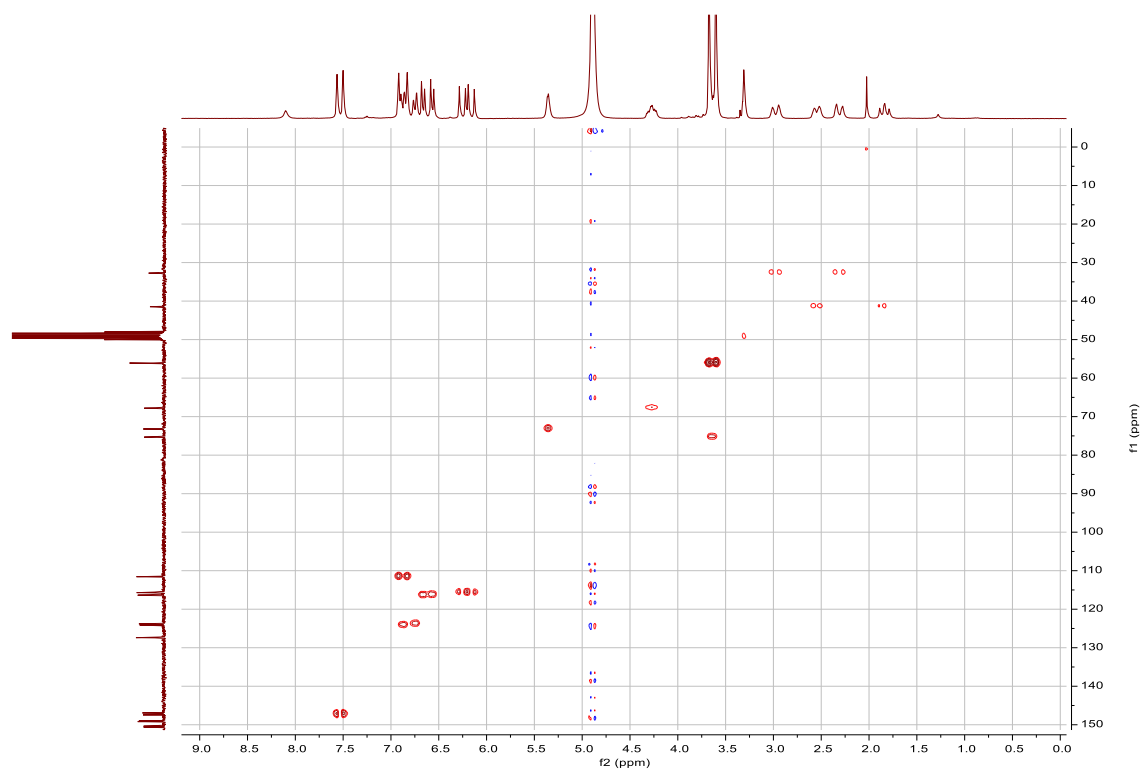

The HMQC spectrum of **1** (250 MHz)

Figure S2. (continued)

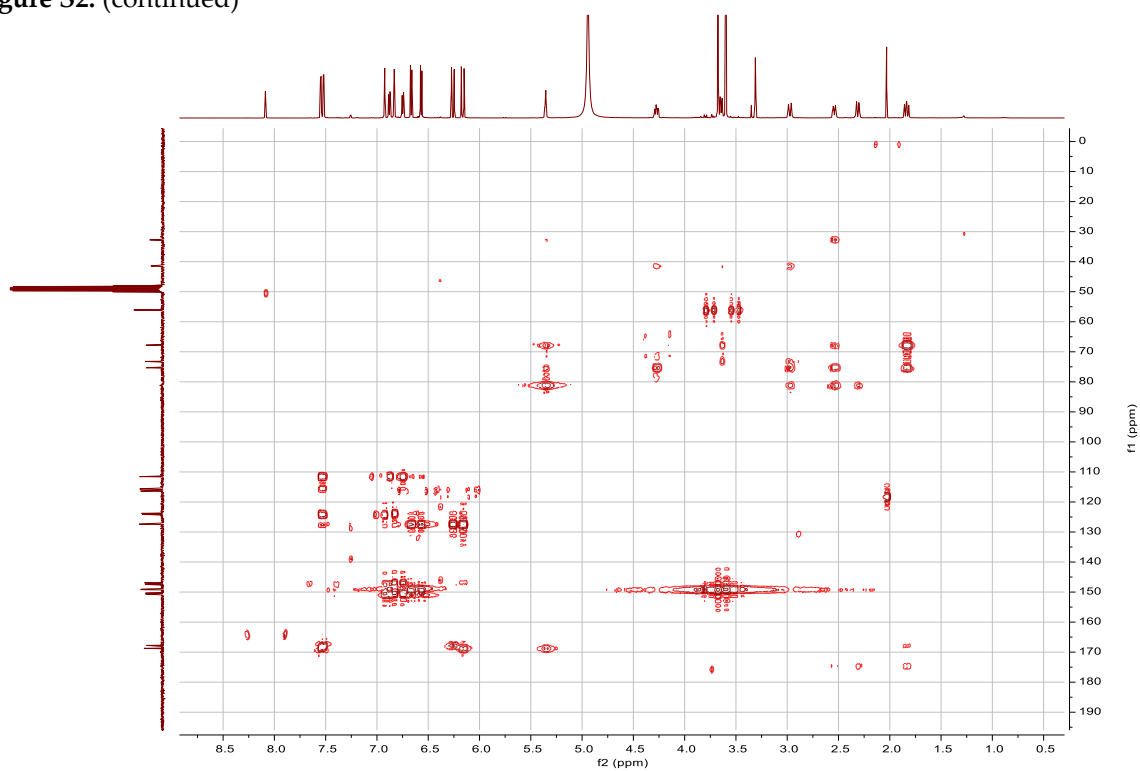

Figure S3. 1D NMR spectra of compound 2 in DMSO-*d*<sub>6</sub>

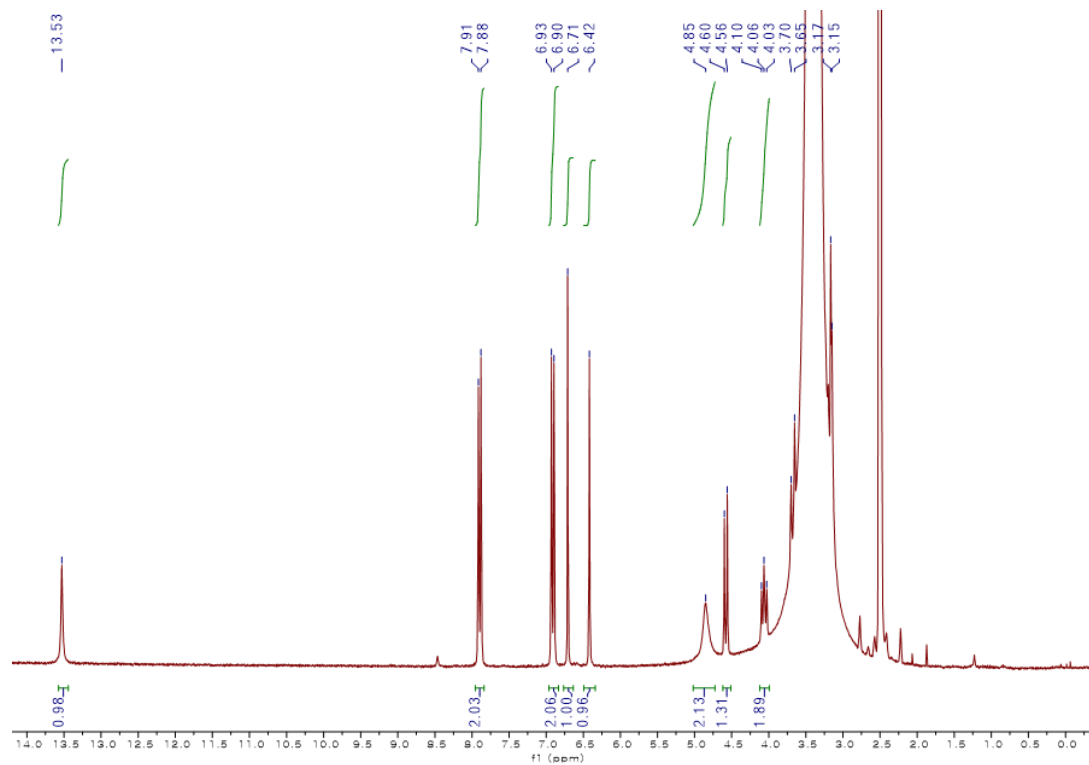

The <sup>1</sup>H NMR spectrum of 2 (250 MHz)

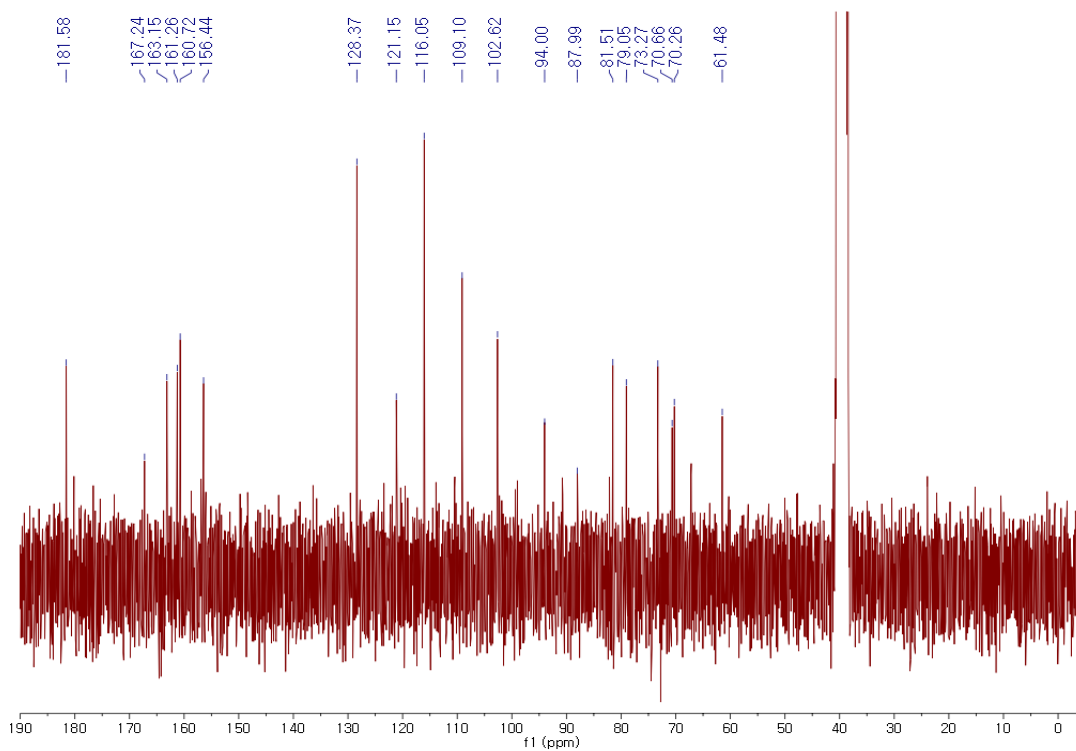

The <sup>13</sup>C NMR spectrum of 2 (62.5 MHz)

Figure S4. 1D NMR spectra of compound 3 in CD<sub>3</sub>OD

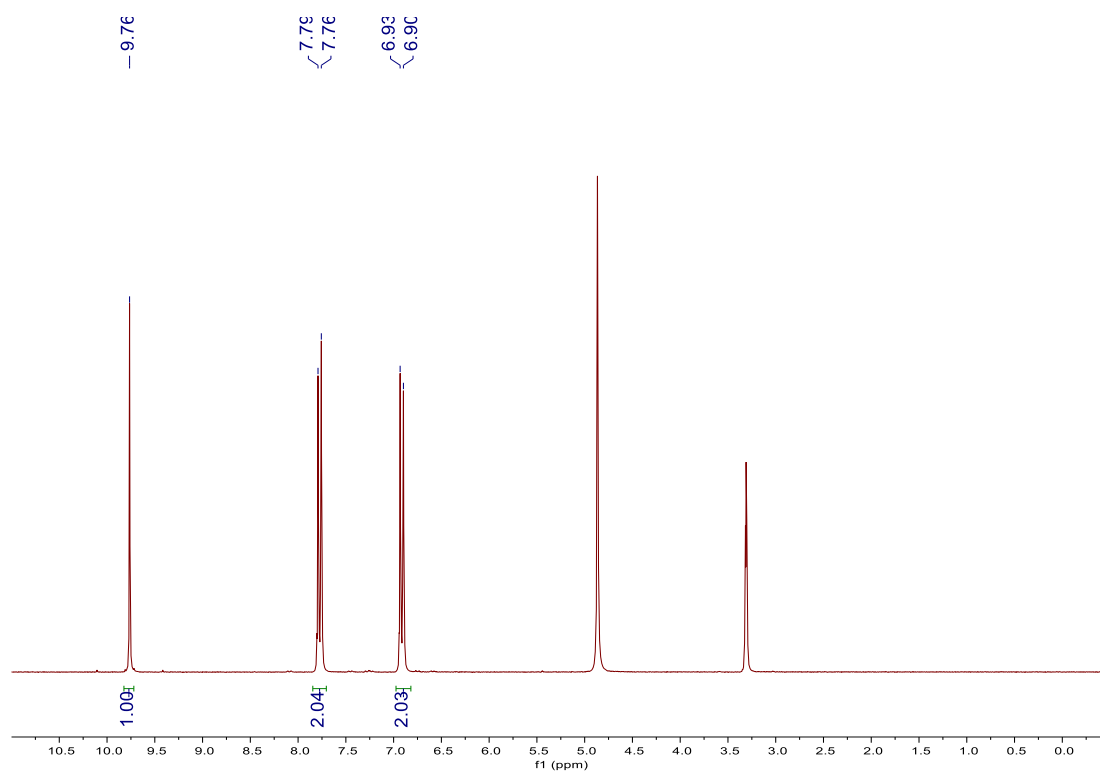

The <sup>1</sup>H NMR spectrum of 3 (250 MHz)

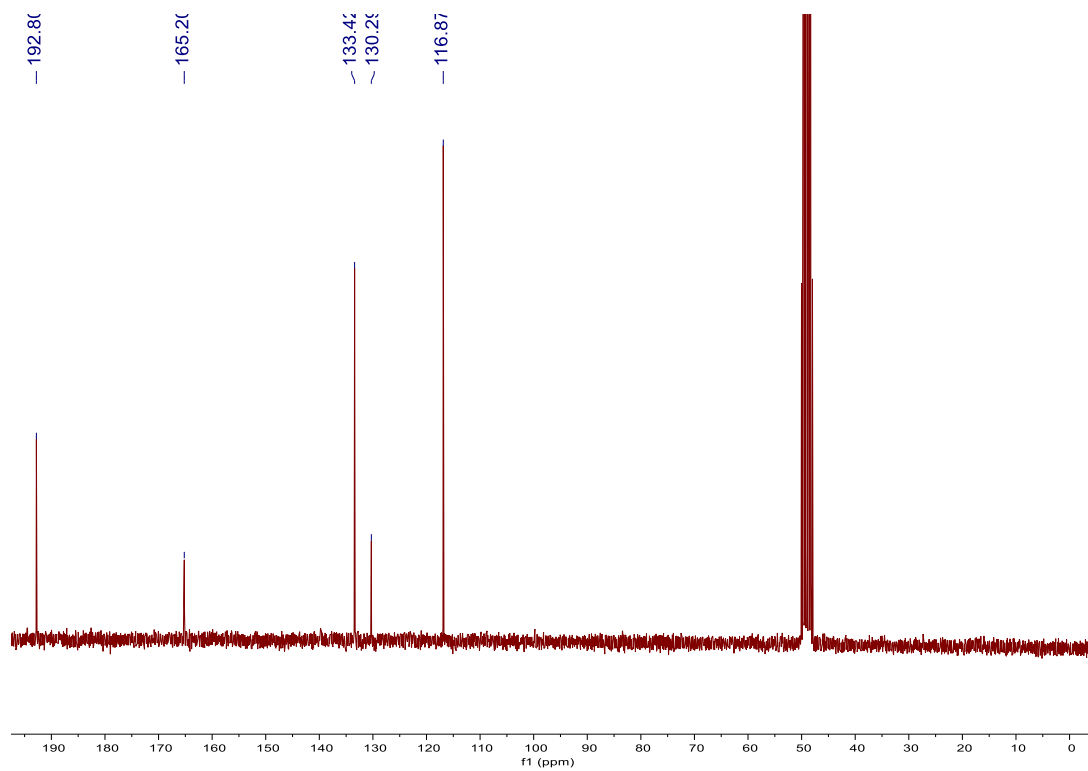

The  $^{13}\text{C}$  NMR spectrum of **3** (62.5 MHz)

Figure S5. 1D NMR spectra of compound **4** in CD<sub>3</sub>OD

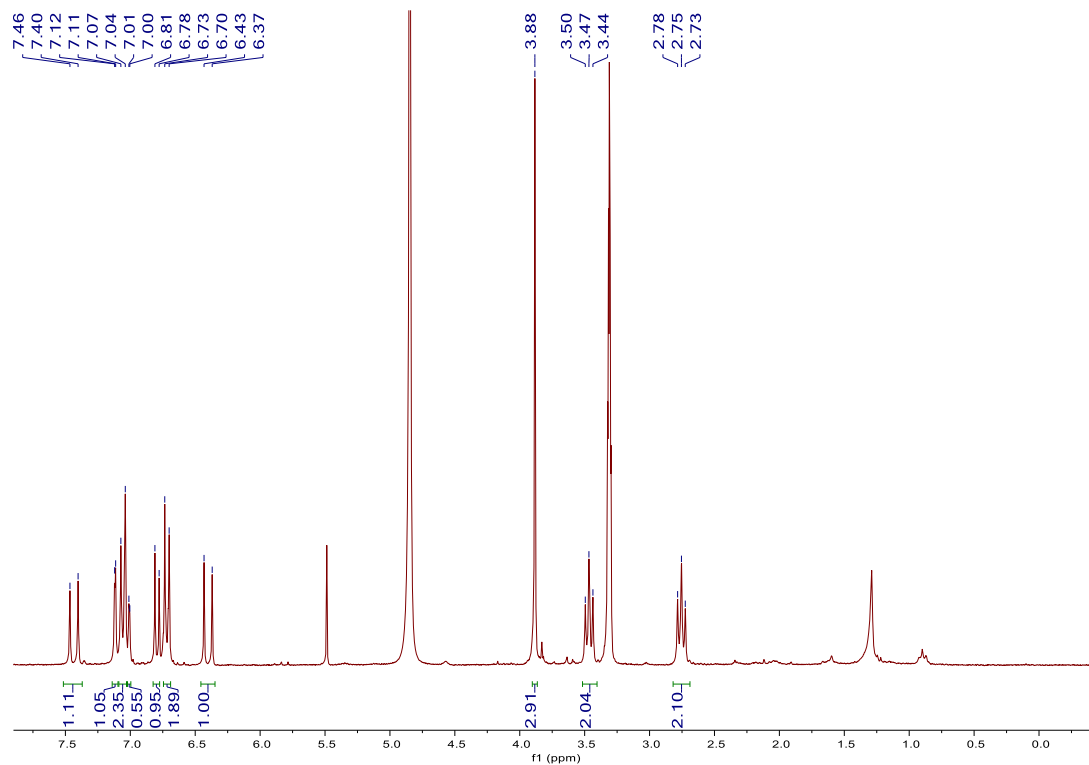

The <sup>1</sup>H NMR spectrum of **4** (250 MHz)

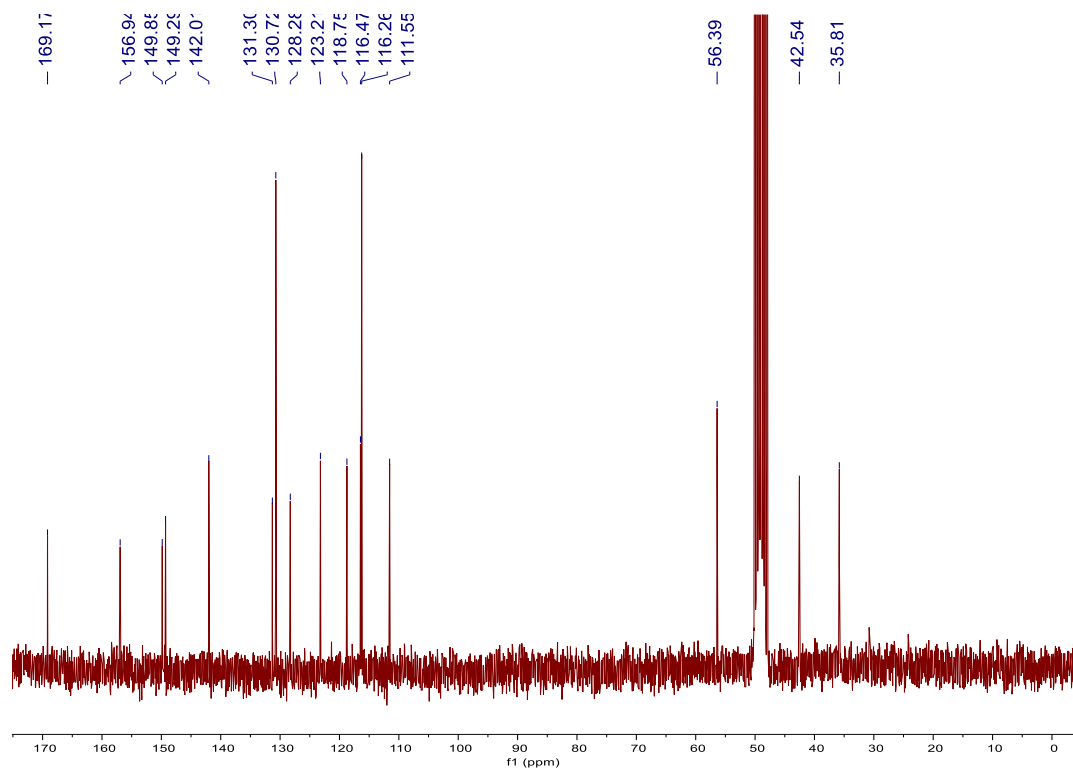

The <sup>13</sup>C NMR spectrum of **4** (62.5 MHz)



Figure S6. 1D NMR spectra of compound 5 in CD<sub>3</sub>OD

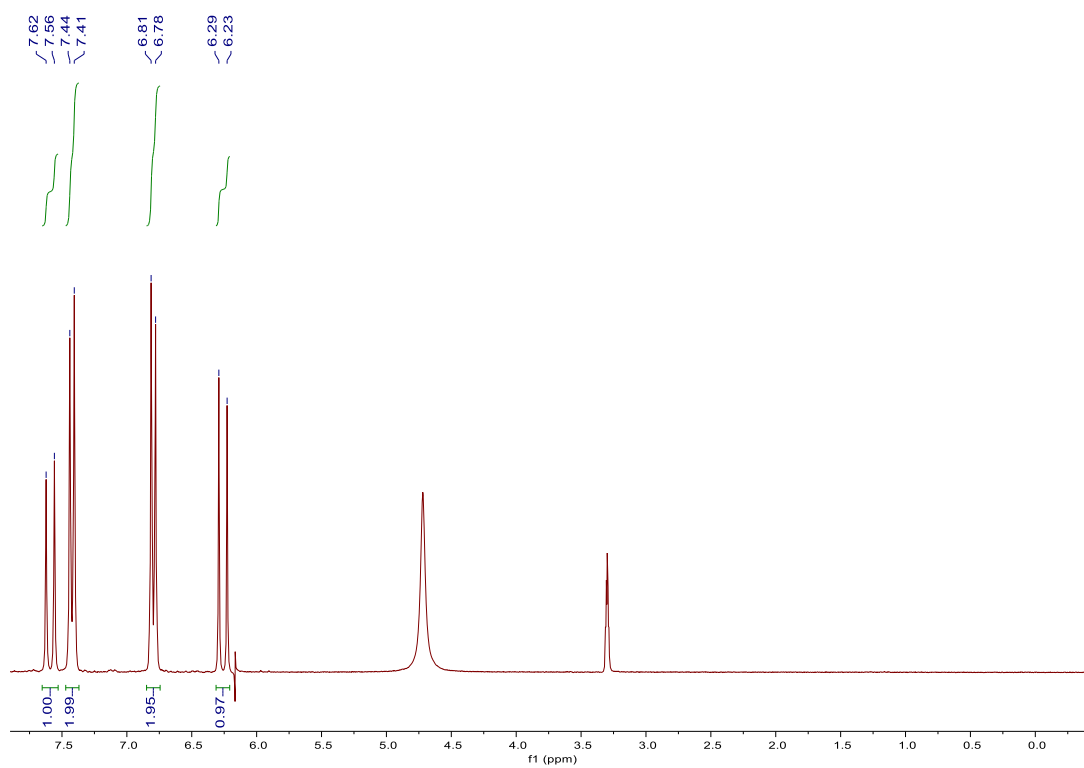

The <sup>1</sup>H NMR spectrum of 5 (250 MHz)

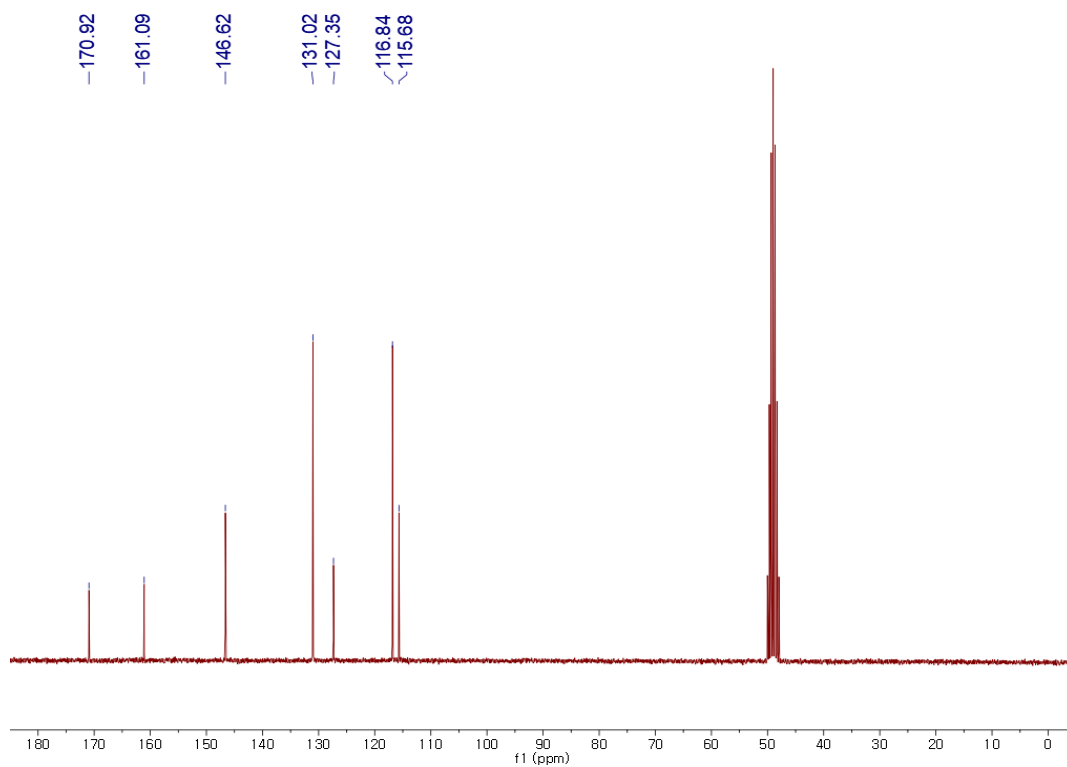

The  $^{13}\text{C}$  NMR spectrum of **5** (62.5 MHz)
